# Supplementary material for: Cross-sectional survey on cigarette smoking in Chinese high-income areas
Source: HighWire-hosted journal article supplement (doi:10.1136/bmjopen-2021-056209), 2022-04-01
Supplement: bmjopen-2021-056209supp001_data_supplement.pdf [file bmjopen-2021-056209supp001_data_supplement.pdf]

Table 1 Question of smoking

| Code | Statement about smoking                                                        |
|------|--------------------------------------------------------------------------------|
| 1    | Smoking can cause serious illness                                              |
| 2    | Smoking can cause stroke (blood clots in the brain that many causes paralysis) |
| 3    | Smoking can cause heart disease                                                |
| 4    | Smoking can cause lung cancer                                                  |
| 5    | Smoking can cause erectile dysfunction                                         |
| 6    | Second-hand smoke can cause serious illness among non-smokers                  |
| 7    | Second-hand smoke can cause heart disease in adults                            |
| 8    | Second-hand smoke can cause lung illness in children                           |
| 9    | Second-hand smoke can cause lung cancer in adults                              |
| 10   | Do you think low tar cigarettes are less harmful than regular cigarettes?      |
| 11   | Do you think smoking should be allowed in hospital                             |
| 12   | Do you think smoking should be allowed in public transportation vehicles       |

Table2 Survey area smoking rates

| Province  | Population (Ten thousand) |       |       | Smoking rates (%) |      |       |
|-----------|---------------------------|-------|-------|-------------------|------|-------|
|           | Female                    | Male  | Total | Female            | Male | Total |
| Beijing   | 952                       | 978   | 1930  | 40.51             | 0.89 | 17.28 |
| Tianjin   | 751                       | 649   | 1400  | 48.65             | 4.88 | 25.64 |
| Shanghai  | 1118                      | 1068  | 2186  | 46.35             | 0.39 | 22.29 |
| Jiangsu   | 3497                      | 3446  | 6943  | 50.40             | 1.40 | 24.30 |
| Zhejiang  | 2549                      | 2402  | 4950  | 37.72             | 0.22 | 16.41 |
| Fujian    | 1688                      | 1593  | 3281  | 52.63             | 7.14 | 33.33 |
| Guangdong | 5069                      | 4357  | 9426  | 40.93             | 0.51 | 47.60 |
| Total     | 15625                     | 14491 | 30116 | 44.52             | 1.62 | 30.75 |

Table 3 Question of smoking cessation

---

| Code | Statement about smoking cessation                                                                                     |
|------|-----------------------------------------------------------------------------------------------------------------------|
| B16  | During any visit to a doctor or health care provider in the past 12 months, were you asked if you smoke tobacco?      |
| B17  | During any visit to a doctor or health care provider in the past 12 months, were you advised to quit smoking tobacco? |
| D02A | Thinking about the last time you tried to quit, how long did you stop smoking?                                        |

---
